# Supplementary material for: Large-area, stretchable, super flexible and mechanically stable thermoelectric films of polymer/carbon nanotube composites
Source: Royal Society of Chemistry journal article supplement (doi:10.1039/c5tc03768a), 2015-12-14
Supplement: c5tc03768a1.pdf [file c5tc03768a1.pdf]

## Supporting Information for

### Large-area, stretchable, super flexible and mechanically-stable thermoelectric films of polymer/carbon nanotube composites

Lirong Liang, Caiyan Gao, Guangming Chen\* and Cun-Yue Guo\*

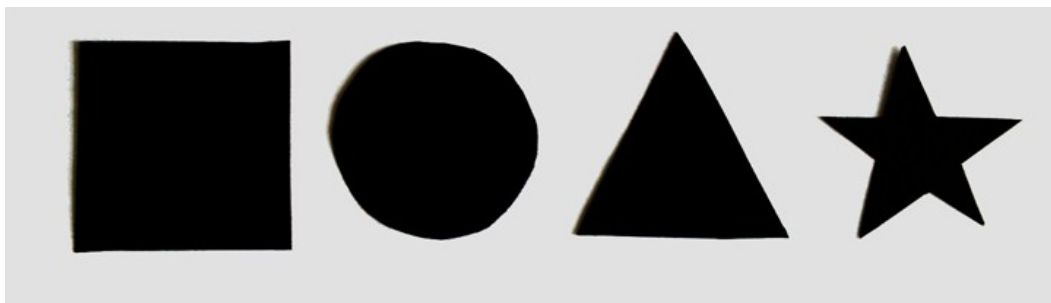

Fig. S1 The PPy/SWCNT composite films can be easily cut into a variety of shapes including squares, circles, triangles and stars.

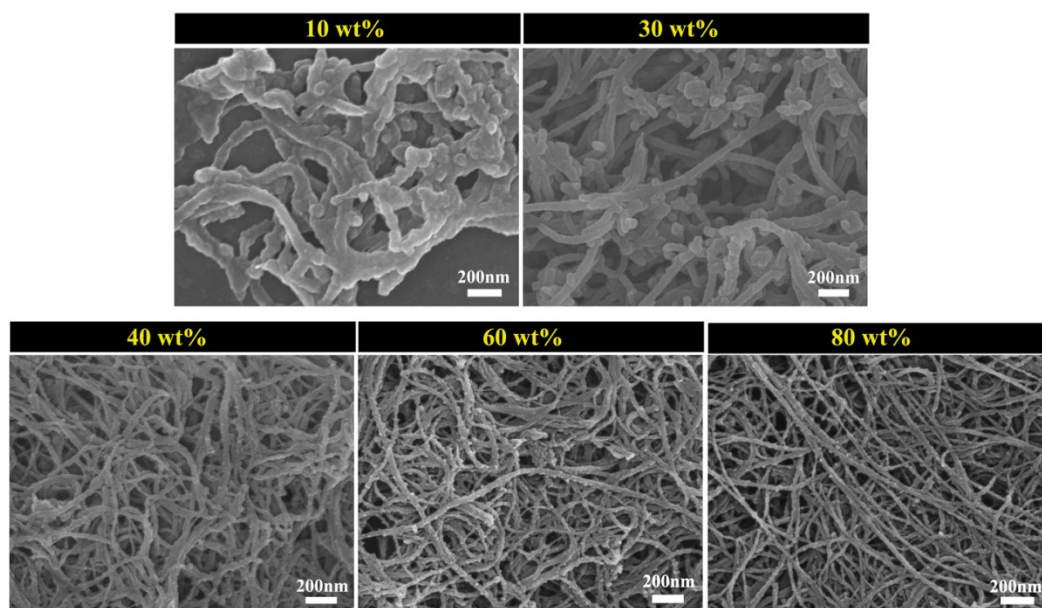

Fig. S2 FESEM images of PPy/SWCNT composites prepared in water. The effect of reaction medium using water on composite morphology with a variety of SWCNT:Py mass ratios.

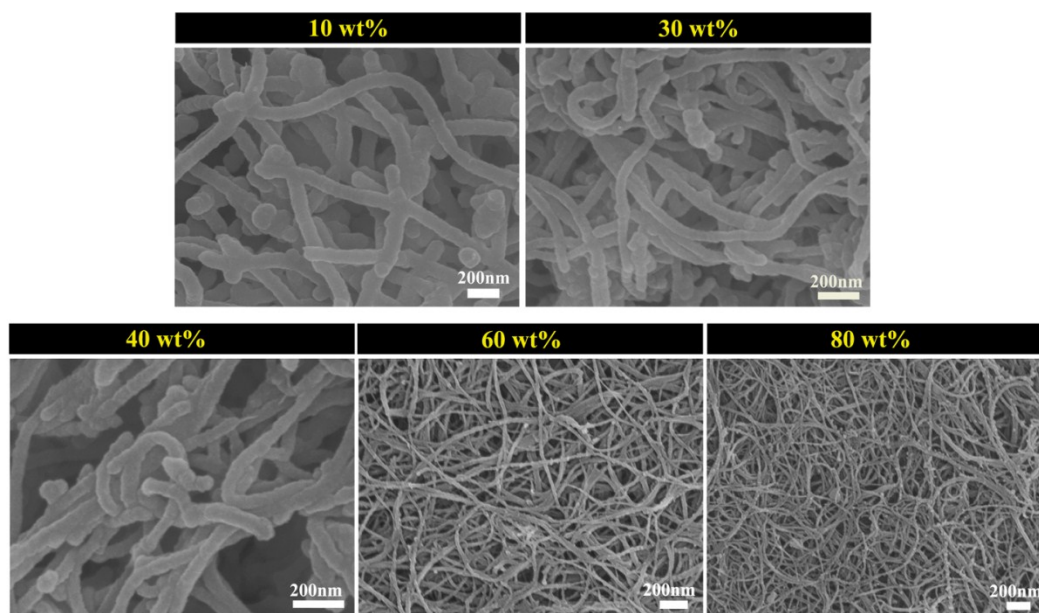

Fig. S3 FESEM images of PPy/SWCNT composites prepared in aqueous ethanol. The effect of reaction medium using aqueous ethanol on composite morphology with a variety of SWCNT:Py mass ratios.

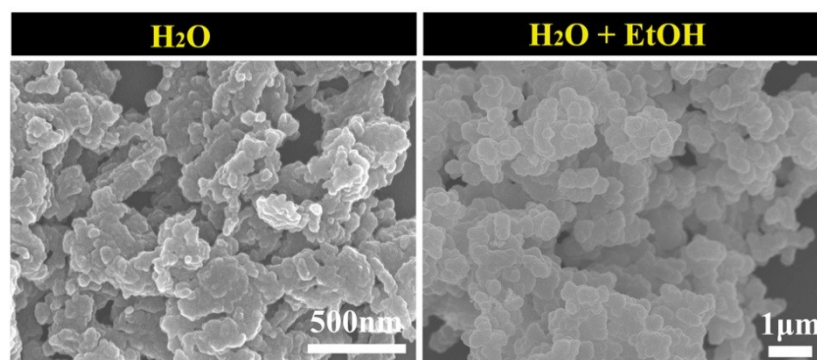

Fig. S4 FESEM images of PPy prepared in the water and aqueous ethanol.

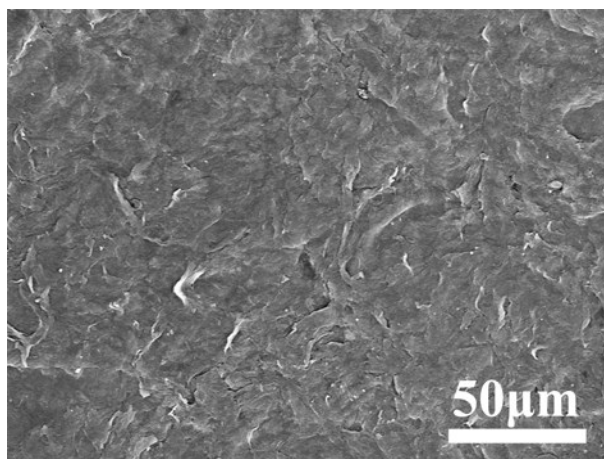

Fig. S5 The original morphology for the PPy/SWCNT composite (SWCNT:Py ratio of 40 wt%, prepared in aqueous ethanol) film before mechanical bending and stretching.
